# Supplementary material for: The Continental Divide: Anti-TNF Use in Pediatric IBD Is Different in North America Compared to Other Parts of the World
Source: Hindawi journal article supplement (doi:10.1155/2018/3190548), 2018-06-12
Supplement: f1 [file 3190548.f1.pdf]

## SUPPLEMENTAL TABLES

Supplemental Table 1. Practice patterns in luminal Crohn's disease with infliximab (IFX) and adalimumab (ADA) comparing Canada and USA. Results are presented as percentages or median (interquartile range) as appropriate.

|                                                       | Canada<br>N=32 | USA<br>N=150 | p-value |
|-------------------------------------------------------|----------------|--------------|---------|
| Percentage of patients treated with anti-TNF therapy  | 36 (25-50)     | 50 (30-65)   | 0.004   |
| Anti-TNF sometimes used without IM trial              | 84%            | 79%          | 0.464   |
| Percentage of time combination IM used with anti-TNF  |                |              |         |
| IFX    IM-naïve                                       | 85 (50-100)    | 30 (1-80)    | 0.001   |
| After IM failure                                      | 98 (50-100)    | 75 (30-100)  | 0.027   |
| ADA    IM- and IFX-naïve                              | 50 (20-100)    | 20 (0-85)    | 0.043   |
| after IFX LoR                                         | 100 (35-100)   | 70 (5-100)   | 0.046   |
| Thiopurine always or usually chosen as combination IM |                |              |         |
| IFX                                                   | 15%            | 26%          | 0.209   |
| ADA    IM-naïve                                       | 13%            | 23%          | 0.331   |
| after IFX LoR                                         | 18%            | 26%          | 0.491   |
| Combination IM continued indefinitely                 |                |              |         |
| IFX                                                   | 52%            | 47%          | 0.611   |
| ADA    IM-naïve                                       | 58%            | 46%          | 0.494   |
| after IFX LoR                                         | 64%            | 52%          | 0.697   |
| Always adhere to standard induction                   |                |              |         |
| IFX                                                   | 38%            | 43%          | 0.494   |
| ADA                                                   | 50%            | 70%          | 0.091   |

Supplemental Table 2. Practice patterns in luminal Crohn's disease with infliximab (IFX) and adalimumab (ADA) comparing university-based and community-based practices. Results are presented as percentages or median (interquartile range) as appropriate.

|                                                       | Community<br>N=96 | University<br>N=248 | p-value |
|-------------------------------------------------------|-------------------|---------------------|---------|
| Percentage of patients treated with anti-TNF therapy  | 40 (25-60)        | 40 (20-60)          | 0.116   |
| Anti-TNF sometimes used without IM trial              | 53%               | 61%                 | 0.215   |
| Percentage of time combination IM used with anti-TNF  |                   |                     |         |
| IFX    IM-naïve                                       | 25 (0-100)        | 80 (20-100)         | 0.003   |
| After IM failure                                      | 75 (20-100)       | 90 (50-100)         | 0.027   |
| ADA    IM- and IFX-naïve                              | 20 (0-80)         | 50 (0-95)           | 0.123   |
| after IFX LoR                                         | 50 (0-90)         | 90 (20-100)         | 0.009   |
| Thiopurine always or usually chosen as combination IM |                   |                     |         |
| IFX                                                   | 54%               | 55%                 | 0.534   |
| ADA    IM-naïve                                       | 50%               | 45%                 | 0.630   |
| after IFX LoR                                         | 47%               | 42%                 | 0.711   |
| Combination IM continued indefinitely                 |                   |                     |         |
| IFX                                                   | 32%               | 37%                 | 0.828   |
| ADA    IM-naïve                                       | 29%               | 36%                 | 0.488   |
| after IFX LoR                                         | 40%               | 42%                 | 0.920   |
| Always adhere to standard induction                   |                   |                     |         |
| IFX                                                   | 54%               | 57%                 | 0.433   |
| ADA                                                   | 67%               | 65%                 | 0.792   |

Supplemental Table 3. Practice patterns in luminal Crohn's disease with infliximab (IFX) and adalimumab (ADA) comparing those new to practice (<10 years after fellowship training) to others ( $\geq 10$  years after training). Results are presented as percentages or median (interquartile range) as appropriate.

|                                                       |     |                   | <10 years<br>N=166 | ≥10 years<br>N=178 | p-value |
|-------------------------------------------------------|-----|-------------------|--------------------|--------------------|---------|
| Percentage of patients treated with anti-TNF therapy  |     |                   | 43 (25-60)         | 40 (25-50)         | 0.154   |
| Anti-TNF sometimes used without IM trial              |     |                   | 58%                | 59%                | 0.915   |
| Percentage of time combination IM used with anti-TNF  |     |                   |                    |                    |         |
|                                                       | IFX | IM-naïve          | 70 (18-100)        | 75 (10-100)        | 0.800   |
|                                                       |     | After IM failure  | 90 (50-100)        | 90 (50-100)        | 0.592   |
|                                                       | ADA | IM- and IFX-naïve | 50 (0-90)          | 50 (0-93)          | 0.599   |
|                                                       |     | after IFX LoR     | 90 (28-100)        | 60 (0-100)         | 0.205   |
| Thiopurine always or usually chosen as combination IM |     |                   |                    |                    |         |
|                                                       | IFX |                   | 52%                | 58%                | 0.282   |
|                                                       | ADA | IM-naïve          | 43%                | 49%                | 0.312   |
|                                                       |     | after IFX LoR     | 38%                | 48%                | 0.105   |
| Combination IM continued indefinitely                 |     |                   |                    |                    |         |
|                                                       | IFX |                   | 32%                | 39%                | 0.476   |
|                                                       | ADA | IM-naïve          | 28%                | 42%                | 0.265   |
|                                                       |     | after IFX LoR     | 37%                | 45%                | 0.875   |
| Always adhere to standard induction                   |     |                   |                    |                    |         |
|                                                       | IFX |                   | 52%                | 60%                | 0.414   |
|                                                       | ADA |                   | 60%                | 71%                | 0.113   |

Supplemental Table 4. Practice patterns in ulcerative colitis with infliximab comparing Canada and USA.

Results are presented as percentages or median (interquartile range) as appropriate.

|                                                       | Canada<br>N=32 | USA<br>N=150 | p-value |
|-------------------------------------------------------|----------------|--------------|---------|
| Percentage of the time Anti-TNF used                  | 20 (8-50)      | 15 (5-30)    | 0.446   |
| Anti-TNF sometimes used without IM trial              |                |              |         |
| Steroid-dependent                                     | 66%            | 78%          | 0.567   |
| Percentage of time combination IM used with anti-TNF  |                |              |         |
| IM-naïve                                              | 90 (20-100)    | 45 (0-80)    | 0.004   |
| After IM-failure                                      | 100 (75-100)   | 70 (20-100)  | 0.006   |
| Thiopurine always or usually chosen as combination IM | 21%            | 39%          | 0.209   |
| Combination IM continued indefinitely                 | 52%            | 42%          | 0.506   |
| Always adhere to standard induction                   |                |              |         |
| Steroid-refractory                                    | 13%            | 45%          | 0.001   |
| Steroid-dependent                                     | 31%            | 55%          | 0.016   |

Supplemental Table 5. Practice patterns in ulcerative colitis with infliximab comparing university-based and community-based practices. Results are presented as percentages or median (interquartile range) as appropriate.

|                                                       | Community<br>N=96 | University<br>N=248 | p-value |
|-------------------------------------------------------|-------------------|---------------------|---------|
| Percentage of the time Anti-TNF used                  | 10 (3-30)         | 11 (5-25)           | 0.384   |
| Anti-TNF sometimes used without IM trial              |                   |                     |         |
| Steroid-dependent                                     | 69%               | 57%                 | 0.198   |
| Percentage of time combination IM used with anti-TNF  |                   |                     |         |
| IM-naïve                                              | 40 (0-98)         | 75 (10-100)         | 0.027   |
| After IM-failure                                      | 75 (23-100)       | 90 (50-100)         | 0.070   |
| Thiopurine always or usually chosen as combination IM | 60%               | 66%                 | 0.213   |
| Combination IM continued indefinitely                 | 32%               | 32%                 | 0.782   |
| Always adhere to standard induction                   |                   |                     |         |
| Steroid-refractory                                    | 55%               | 47%                 | 0.160   |
| Steroid-dependent                                     | 60%               | 62%                 | 0.827   |

Supplemental Table 6. Practice patterns in ulcerative colitis with infliximab comparing those new to practice (<10 years after fellowship training) to others ( $\geq 10$  years after training). Results are presented as percentages or median (interquartile range) as appropriate.

|                                                       | <10 years<br>N=166 | $\geq 10$ years<br>N=178 | p-value |
|-------------------------------------------------------|--------------------|--------------------------|---------|
| Percentage of the time Anti-TNF used                  | 15 (4-25)          | 10 (5-25)                | 0.395   |
| Anti-TNF sometimes used without IM trial              |                    |                          |         |
| Steroid-dependent                                     | 35%                | 56%                      | 0.308   |
| Percentage of time combination IM used with anti-TNF  |                    |                          |         |
| IM-naïve                                              | 50 (8-100)         | 75 (0-100)               | 0.443   |
| After IM-failure                                      | 80 (50-100)        | 90 (50-100)              | 0.682   |
| Thiopurine always or usually chosen as combination IM | 58%                | 70%                      | 0.025   |
| Combination IM continued indefinitely                 | 28%                | 36%                      | 0.069   |
| Always adhere to standard induction                   |                    |                          |         |
| Steroid-refractory                                    | 49%                | 49%                      | 0.905   |
| Steroid-dependent                                     | 60%                | 63%                      | 0.532   |

Supplemental Table 7. Access limitations identified by respondents comparing Canada and USA.

|                                                                                                               | Canada<br>N=32 | USA<br>N=150 | p-value |
|---------------------------------------------------------------------------------------------------------------|----------------|--------------|---------|
| Access never limited for CD                                                                                   | 50%            | 65%          | 0.128   |
| Access never limited for UC                                                                                   | 41%            | 64%          | 0.023   |
| Access is sometimes limited in newly diagnosed CD                                                             | 31%            | 17%          | 0.057   |
| Access is sometimes limited before failure of steroids or EEN followed by IM in CD                            | 41%            | 19%          | 0.009   |
| Access is sometimes limited except in hospitalized, steroid-refractory UC                                     | 16%            | 10%          | 0.356   |
| Access is sometimes limited in steroid-dependent UC before failure of steroids followed by an immunomodulator | 41%            | 19%          | 0.007   |
| Dosing regimen is sometimes limited                                                                           | 31%            | 15%          | 0.025   |
| Duration of anti-TNF therapy is sometimes limited                                                             | 6%             | 2%           | 0.182   |
| Access to day clinics for infusion is sometimes limited                                                       | 9%             | 7%           | 0.694   |

Supplemental Table 8. Access limitations identified by respondents comparing university-based and community-based practices.

|                                                                                                               | Community<br>N=96 | University<br>N=248 | p-value |
|---------------------------------------------------------------------------------------------------------------|-------------------|---------------------|---------|
| Access never limited for CD                                                                                   | 70%               | 61%                 | 0.164   |
| Access never limited for UC                                                                                   | 73%               | 59%                 | 0.029   |
| Access is sometimes limited in newly diagnosed CD                                                             | 17%               | 20%                 | 0.460   |
| Access is sometimes limited before failure of steroids or EEN followed by IM in CD                            | 18%               | 27%                 | 0.071   |
| Access is sometimes limited except in hospitalized, steroid-refractory UC                                     | 12%               | 12%                 | 0.870   |
| Access is sometimes limited in steroid-dependent UC before failure of steroids followed by an immunomodulator | 17%               | 24%                 | 0.131   |
| Dosing regimen is sometimes limited                                                                           | 14%               | 19%                 | 0.205   |
| Duration of anti-TNF therapy is sometimes limited                                                             | 4%                | 5%                  | 0.581   |
| Access to day clinics for infusion is sometimes limited                                                       | 5%                | 8%                  | 0.360   |



Supplemental Table 9. Access limitations identified by respondents comparing those new to practice (<10 years after fellowship training) to others ( $\geq 10$  years after training).

|                                                                                                               | <10 years<br>N=166 | $\geq 10$ years<br>N=178 | p-value |
|---------------------------------------------------------------------------------------------------------------|--------------------|--------------------------|---------|
| Access never limited for CD                                                                                   | 60%                | 67%                      | 0.187   |
| Access never limited for UC                                                                                   | 59%                | 65%                      | 0.264   |
| Access is sometimes limited in newly diagnosed CD                                                             | 24%                | 15%                      | 0.026   |
| Access is sometimes limited before failure of steroids or EEN followed by IM in CD                            | 27%                | 22%                      | 0.262   |
| Access is sometimes limited except in hospitalized, steroid-refractory UC                                     | 12%                | 12%                      | 0.943   |
| Access is sometimes limited in steroid-dependent UC before failure of steroids followed by an immunomodulator | 41%                | 35%                      | 0.261   |
| Dosing regimen is sometimes limited                                                                           | 18%                | 17%                      | 0.873   |
| Duration of anti-TNF therapy is sometimes limited                                                             | 5%                 | 6%                       | 0.740   |
| Access to day clinics for infusion is sometimes limited                                                       | 8%                 | 6%                       | 0.421   |
